# Supplementary material for: Evolution of African barbs from the Lake Victoria drainage system, Kenya
Source: PeerJ. 2018 Oct 26;6:e5762. doi: 10.7717/peerj.5762 (PMC6204829; doi:10.7717/peerj.5762)
Supplement: Table S1 — Specimen information for samples sequenced in this study including geographic coordinates and GenBank Accession Numbers. Locality numbers match labels in Figures. Blue font indicates specimens for which both the Cytb and GH sequence were obtained. [file peerj-06-5762-s001.xlsx]

## Sheet: TableS1
Sample site/ locality	Locality number	Longitude	Latitude	Species	Specimen ID	Cytb Sequence	Label in Cytb tree	Cytb GenBank Accesssion	GH Sequence	Label in GH tree	GH GenBank Accesssion
River Awachrae, Kisumu County, Kenya	7	34°57'23.3"E	0°14'00.7"S	'Barbus' jacksoni	BJ_2	AWRBJ2	AWRBJ2 i_2_river Awachrae [7]	MH484591	BJ_2	Awachrae BJ_2 [7]	MH484523
River Awachrae, Kisumu County, Kenya	7	34°57'23.3"E	0°14'00.7"S	'Barbus' jacksoni	BJ_15	AWRBJ15	AWRBJ15 i_15_river Awachrae [7]	MH484593
River Awachrae, Kisumu County, Kenya	7	34°57'23.3"E	0°14'00.7"S	'Barbus' jacksoni	Bspp_1	AWRBSPP1	AWRBSPP1 B. spp._1_ river Awachrae [7]	MH484598	Bssp1	Awachrae Bssp1 [7]	MH484527
River Awachrae, Kisumu County, Kenya	7	34°57'23.3"E	0°14'00.7"S	'Barbus' jacksoni	Bspp_2	AWRBsp2	AWRBsp2 B. spp._2_ river Awachrae [7]	MH484597	A08_Bspp2_GH	Bspp2_river Awachrae [7]	MH484522
River Awachrae, Kisumu County, Kenya	7	34°57'23.3"E	0°14'00.7"S	'Barbus' jacksoni	BJ_8	B_jacksoni_8_river_Awachrae	B_jacksoni_8_river Awachrae [7]	MH484590	BJ_8	Awachrae BJ_8 [7]	MH484531
River Awachrae, Kisumu County, Kenya	7	34°57'23.3"E	0°14'00.7"S	'Barbus' jacksoni	BJ_9				BJ_9	Awachrae BJ_9 [7]	MH484530
River Awachrae, Kisumu County, Kenya	7	34°57'23.3"E	0°14'00.7"S	'Barbus' jacksoni	BJ_12	AWRBJ12	AWRBJ12 i_12_river Awachrae [7]	MH484592	BJ_12	Awachrae BJ_12 [7]	MH484529
Yenga dam, Siaya, Kenya	15	34°12'39.21"E	0°12'54.78"N	'Barbus' jacksoni	Pld_1	new_Pld1	new_Pld1 new_1 Yenga dam (whole spec) [15]	MH484572	Pld_1	Yenga dam Pld_1 [15]	MH484525
Yenga dam, Siaya, Kenya	15	34°12'39.21"E	0°12'54.78"N	'Barbus' jacksoni	Pld_2	new_Pld2	new_Pld2 new_2 Yenga dam (whole spec) [15]	MH484573	Pld_2	Yenga dam Pld_2 [15]	MH484526
Yenga dam, Siaya, Kenya	15	34°12'39.21"E	0°12'54.78"N	'Barbus' jacksoni	Pld_3	new_Pld_3	new_Pld_3 new_3 Yenga dam (whole spec) [15]	MH484574	Pld3	Yenga dam Pld3 [15]	MH484528
Yenga dam, Siaya, Kenya	15	34°12'39.21"E	0°12'54.78"N	'Barbus' jacksoni	Pld_4	new_Pld_4	new_Pld_4 new_4 Yenga dam (whole spec) [15]	MH484575	Pld_4	Yenga dam Pld_4[15]	MH484524
River Kisian , Kisumu, Kenya	9	34° 40.043'E	0° 4.274'S	'Barbus' cercops	KC3	KC03	KC03 _3_river Kisian [9]	MH484583	KC3	Kisian KC3 [9]	MH484532
River AwachKendu, Homa Bay County, Kenya	5	34° 38.145'E	0° 22.817'S	'Barbus' cercops	AKC4	AKC4	AKC4 _4_river AwachKendu [5]	MH484589	AKC4	AwachKendu AKC4 [5]	MH484537
River AwachKendu, Homa Bay County, Kenya	5	34° 38.145'E	0° 22.817'S	'Barbus' cercops	AKC3	AKC3	AKC3 _3_river AwachKendu [5]	MH484588	AKC3	AwachKendu AKC3 [5]	MH484535
Kokech dam, Migori, Kenya	1	34°42'14.8"E	0°31'02.7"S	'Barbus' cercops	KKC1				KKC1	Kokech Dam KKC1 [1]	MH484538
River Awachrae, Kisumu County, Kenya (Aquarium stock established 2013-2014, KMFRI)	7	34°57'23.3"E	0°14'00.7"S	'Barbus' cercops	BCGH1				BCGH1	BCGH1 [7]	MH484533
Kokech dam, Migori Kenya	1	34°42'14.8"E	0°31'02.7"S	'Barbus' cercops	KKDC3	KKC3	KKC3 _3_Kokech dam [1]	MH484585	KKDC3	Kokech Dam KKDC3 [1]	MH484534
Kokech dam, Migori Kenya	1	34°42'14.8"E	0°31'02.7"S	'Barbus' cercops	KKDC4	KKC4	KKC4 _4_Kokech dam [1]	MH484587	KKDC4	Kokech Dam KKDC4 [1]	MH484536
River AwachKendu, Homa Bay County, Kenya	5	34° 38.145'E	0° 22.817'S	'Barbus' cercops	AKC2	AKC2	AKC2 _2_river AwachKendu [5]	MH484586	AKC2	AwachKendu AKC2 [5]	MH484539
Ufinya dam, Siaya, Kenya	13	34° 16.874'E	0° 3.144' N	'Barbus' cf. paludinosus	Pld2UFgh	Pld2UF	Pld2UF Ufinya dam [13]	MH484601	Pld2UFgh	Pld2UFgh Ufinya dam [13]	MH484555
Ufinya dam, Siaya, Kenya	13	34° 16.874'E	0° 3.144' N	'Barbus' cf. paludinosus	Pld1UFgh				Pld1UFgh	Pld1UFgh Ufinya dam [13]	MH484554
Ufinya dam, Siaya, Kenya	13	34° 16.874'E	0° 3.144' N	'Barbus' cf. paludinosus	Pld3UF				Pld3UF	Pld3UF Ufinya dam [13]	MH484554
Uriri dam, Migori, Kenya	2	34° 30.842'E	0° 57.686'S	'Barbus' apleurogramma	Uraplr8	new_Urapl8ct	new_Urapl8ct new_8_Uriri dam (whole spec) [2]	MH484566	Uraplr8	Uriri dam Uraplr8 [2]	MH484540
Uriri dam, Migori, Kenya	2	34° 30.842'E	0° 57.686'S	'Barbus' apleurogramma	Uraplr9	new_Urapl9ct	new_Urapl9ct new_9_Uriri dam [2]	MH484567	Uraplr9	Uriri dam Uraplr9 [2]	MH484542
Uriri dam, Migori, Kenya	2	34° 30.842'E	0° 57.686'S	'Barbus' apleurogramma	Uraplr11	new_Uapl11ct	new_Uapl11ct new_11_Uriri dam [2]	MH484568	Uraplr11	Uriri dam Uraplr11 [2]	MH484541
River Kuja, Migori county, Kenya	3	34°20'41.78"E	0°54'54.63"S	'Barbus' neumayeri	Nmy1KJ	Nmy1KJ	Nmy1KJ (whole specimen) [3]	MH484599
River Kuja, Migori county, Kenya	3	34°20'41.78"E	0°54'54.63"S	'Barbus' neumayeri	Nmy2KJg	Nmy2KJ	Nmy2KJ (whole specimen) [3]	MH484600	Nmy2KJg	Nmy2KJg Kuja [3]	MH484544
River Kuja, Migori county, Kenya	3	34°20'41.78"E	0°54'54.63"S	'Barbus' neumayeri	Nmy3KJg				Nmy3KJg	Nmy3KJg Kuja [3]	MH484543
Mauna dam, Siaya, Kenya	14	34° 9.445'E	0° 12.377'N	'Barbus' kerstenii	MN_apl2	MNAPL2	MNAPL2 _2_ Mauna dam [14]	MH484580	MN_apl2	Mauna dam MN_apl2 [14]	MH484548
upper Sondu miriu river, Kenya (Aquarium stock established 2014, KMFRI)	6	34°48'38.68"E	0°21'3.15"S	'Barbus' kerstenii	krst_NW1	new_KtN1	new_KtN1 new_1_Aquarium (whole spec)	MH484564	krst_NW1	krst_NW1 [6]	MH484549
Mauna dam, Siaya, Kenya	14	34° 9.445'E	0° 12.377'N	'Barbus' kerstenii	MN_apl3				MN_apl3	Mauna dam MN_apl3 [14]	MH484547
upper Sondu miriu river, Kenya (Aquarium stock established 2014, KMFRI)	6	34°48'38.68"E	0°21'3.15"S	'Barbus' kerstenii	Krst_NW3	new_KtN3	new_KtN3 new_3_Aquarium (whole spec)	MH484565	krst_NW3	krst_NW3 [6]	MH484546
Mauna dam, Siaya, Kenya	14	34° 9.445'E	0° 12.377'N	'Barbus' kerstenii	MN_apl1	MNAPL1	MNAPL1 _1_ Mauna dam [14]	MH484579	MN_apl1	Mauna dam MN_apl1 [14]	MH484551
upper Sondu miriu river, Kenya (Aquarium stock established 2014, KMFRI Kenya)	6	34°48'38.68"E	0°21'3.15"S	'Barbus' kerstenii	Krst_NW2	new_NZW2	new_NZW2 new_2ii_ Aquarium (whole spec)	MH484571	krst_NW2	krst_NW2 [6]	MH484550
Kokech Dam, Kenya	1	34°42'14.8"E	0°31'02.7"S	'Barbus' kerstenii	KKD_APLi	KKD_APLi	KKD_APLi _1_Kokech dam [1]	MH484581
River Awach seme, Homa Bay County, Kenya (Aquarium stock established 2013-2014, KMFRI)	10	34° 59'18.35''E	0° 15'15.07''S	'Barbus' nyanzae	BNYZ_NW1				BNYZ_NW1	BNYZ_NW1 [10]	MH484545
River Awach seme, Homa Bay County, Kenya (Aquarium stock established 2013-2014, KMFRI)	10	34° 59'18.35''E	0° 15'15.07''S	'Barbus' nyanzae	new_NZN2	new_NZN2	new_NZN2 new_2_ Aquarium (whole spec)	MH484570
River Awachrae, Kisumu County, Kenya	7	34°57'23.3"E	0°14'00.7"S	'Barbus' nyanzae	ARC3	ARC3	ARC3 _3_river Awachrae [7]	MH484584
River Awach seme, Homa Bay County, Kenya (Aquarium stock established 2013-2014, KMFRI)	10	34° 59'18.35''E	0° 15'15.07''S	'Barbus' nyanzae	AWRNZ5	AWRNZ5	AWRNZ5 _5_river Awachrae [7]	MH484596
River Awachrae, Kisumu County, Kenya	7	34°57'23.3"E	0°14'00.7"S	'Barbus' nyanzae	ARC2	ARC2	ARC2 _2_river Awachrae [7]	MH484582
River Awachrae, Kisumu County, Kenya	7	34°57'23.3"E	0°14'00.7"S	'Barbus' nyanzae	AWR_AMP27	AWR_AMP27	AWR_AMP27_27_ river Awachrae [7]	MH484576
River Awachrae, Kisumu County, Kenya	7	34°57'23.3"E	0°14'00.7"S	'Barbus' nyanzae	AWRNZ1	AWRNZ1	AWRNZ1 _1_river Awachrae [7]	MH484594
River Awachrae, Kisumu County, Kenya	7	34°57'23.3"E	0°14'00.7"S	'Barbus' nyanzae	AWRNZ2	AWRNZ2	AWRNZ2 _2_river Awachrae [7]	MH484595
River Awachrae, Kisumu County, Kenya	7	34°57'23.3"E	0°14'00.7"S	'Barbus' nyanzae	AWR_AMP21	AWR_AMP21	AWR_AMP21_21_ river Awachrae [7]	MH484577
River Awachrae, Kisumu County, Kenya	7	34°57'23.3"E	0°14'00.7"S	'Barbus' nyanzae	AWR_AMP24	AWR_AMP24	AWR_AMP24_24_ river Awachrae [7]	MH484578
River Awach seme, Homa Bay County, Kenya (Aquarium stock established 2013-2014, KMFRI)	10	34° 59'18.35''E	0° 15'15.07''S	'Barbus' nyanzae	new_NZN1	new_NZN1	new_NZN1 new_1_Aquarium (whole spec)	MH484569
Dunga beach, Kisumu, Kenya	8	34°44'12.19"E	0° 8'41.20"S	'Barbus' profundus	DNG_PROF4 _4	DNG_PROF4	B. profundus 4 Dunga beach [8]	MH484556
Dunga beach, Kisumu, Kenya	8	34°44'12.19"E	0° 8'41.20"S	'Barbus' profundus	DNG_PROF3 _3	DNG_PROF3	B. profundus 3 Dunga beach [8]	MH484557	Prof3gh	Prof3gh Dunga beach [8]	MH484552
Dunga beach, Kisumu, Kenya	8	34°44'12.19"E	0° 8'41.20"S	'Barbus' profundus	DNG_PROF2 _2	DNG_PROF1	B. profundus 1 Dunga beach [8]	MH484558
Dunga beach, Kisumu, Kenya	8	34°44'12.19"E	0° 8'41.20"S	'Barbus' profundus	DNG_PROF1 _1	DNG_PROF2	B. profundus 2 Dunga beach [8]	MH484559	Prof2gh	Prof2gh Dunga beach [8]	MH484553
River AwachKendu, Homa Bay County, Kenya	5	34° 38.145'E	0° 22.817'S	Labeobarbus altianalis	AK_Balt4	AK_Balt4	AK_Balt4_river Awachkendu [5]	MH484560
River Awach seme, Homa Bay County, Kenya	10	34° 59'18.35''E	0° 15'15.07''S	Labeobarbus altianalis	AS_Balt14	AS_Balt14	AS_Balt14_river Awachseme [10]	MH484561
River Nzoia Nyadorera, Siaya County, Kenya	12	34° 10.198'E	0° 11.313'N	Labeobarbus altianalis	NN_Balt6	NN_Balt6	NN_Balt6_river Nzoia [12]	MH484562
River Oluchi, Homa Bay County, Kenya	4	34° 29.930'E	0° 27.617'S	Labeobarbus altianalis	OL_Balt6	OL_Balt6	OL_Balt6_river Oluchi [4]	MH484563
River Nzoia Bridge, Homa Bay County, Kenya	11	34° 22.551'E	0° 17.541'N	Labeobarbus altianalis	NZ_Alt4	NZAlt4	NZ_Alt4_river Nzoia [11]	MH484602
River Awach seme, Homa Bay County, Kenya	10	34° 59'18.35''E	0° 15'15.07''S	Labeobarbus altianalis	AS_Balt2	ASAlt2	ASAlt2_river Awachseme [10]	MH484603
